# Supplementary material for: Horizontal transfer of expressed genes in a parasitic flowering plant
Source: PubMed Central journal article supplement (PMC3460754; doi:10.1186/1471-2164-13-227), 2012-06-08
Supplement: 1471-2164-13-227-S3.pdf [file 1471-2164-13-227-S3.pdf]

| Species                                     | Family/Order                   | Source                                                                     |
|---------------------------------------------|--------------------------------|----------------------------------------------------------------------------|
| <i>Aquilegia coerulea</i> James [1]         | Ranunculaceae/<br>Ranunculales | ftp://ftp.jgi-psf.org/pub/JGI_data/phytozome/v7.0/Acoerulea/annotation/    |
| <i>Arabidopsis thaliana</i> (L.) Heynh. [2] | Brassicaceae/<br>Brassicales   | ftp://ftp.jgi-psf.org/pub/JGI_data/phytozome/v7.0/Athaliana/annotation/    |
| <i>Manihot esculenta</i> Crantz [1]         | Euphorbiaceae/<br>Malpighiales | ftp://ftp.jgi-psf.org/pub/JGI_data/phytozome/v7.0/Mesculenta/annotation/   |
| <i>Medicago truncatula</i> Gaertn. [1]      | Fabaceae/<br>Fabales           | ftp://ftp.jgi-psf.org/pub/JGI_data/phytozome/v7.0/Mtruncatula/annotation/  |
| <i>Mimulus guttatus</i> DC. [1]             | Phrymaceae/<br>Lamiales        | ftp://ftp.jgi-psf.org/pub/JGI_data/phytozome/v7.0/Mguttatus/annotation/    |
| <i>Oryza sativa</i> L. [3]                  | Poaceae/<br>Poales             | ftp://ftp.jgi-psf.org/pub/JGI_data/phytozome/v7.0/Osativa/annotation/      |
| <i>Populus trichocarpa</i> Torr. & Gray [4] | Salicaceae/<br>Malpighiales    | ftp://ftp.jgi-psf.org/pub/JGI_data/phytozome/v7.0/Ptrichocarpa/annotation/ |
| <i>Ricinus communis</i> L. [5]              | Euphorbiaceae/<br>Malpighiales | ftp://ftp.jgi-psf.org/pub/JGI_data/phytozome/v7.0/Rcommunis/annotation/    |
| <i>Vitis vinifera</i> L. [6]                | Vitaceae/<br>Vitales           | ftp://ftp.jgi-psf.org/pub/JGI_data/phytozome/v7.0/Vvinifera/annotation/    |

## References

1. Goodstein DM, Shu SQ, Howson R, Neupane R, Hayes RD, Fazo J, Mitros T, Dirks W, Hellsten U, Putnam N *et al*: **Phytozome: a comparative platform for green plant genomics**. *Nucleic Acids Res* 2012, **40**:D1178-D1186.
2. Swarbreck D, Wilks C, Lamesch P, Berardini TZ, Garcia-Hernandez M, Foerster H, Li D, Meyer T, Muller R, Ploetz L *et al*: **The Arabidopsis Information Resource (TAIR): gene structure and function annotation**. *Nucleic Acids Res* 2008, **36**:D1009-D1014.
3. Ouyang S, Zhu W, Hamilton J, Lin H, Campbell M, Childs K, Thibaud-Nissen F, Malek RL, Lee Y, Zheng L *et al*: **The TIGR Rice Genome Annotation Resource: Improvements and new features**. *Nucleic Acids Res* 2007, **35**:D883-D887.

4. Tuskan GA, DiFazio S, Jansson S, Bohlmann J, Grigoriev I, Hellsten U, Putnam N, Ralph S, Rombauts S, Salamov A *et al*: **The genome of black cottonwood, *Populus trichocarpa* (Torr. & Gray)**. *Science* 2006, **313**:1596-1604.
5. Chan AP, Crabtree J, Zhao Q, Lorenzi H, Orvis J, Puiu D, Melake-Berhan A, Jones KM, Redman J, Chen G *et al*: **Draft genome sequence of the oilseed species *Ricinus communis***. *Nat Biotechnol* 2010, **28**:951-956.
6. Jaillon O, Aury JM, Noel B, Policriti A, Clepet C, Casagrande A, Choisne N, Aubourg S, Vitulo N, Jubin C *et al*: **The grapevine genome sequence suggests ancestral hexaploidization in major angiosperm phyla**. *Nature* 2007, **449**:463-467.
