# Supplementary material for: Horizontal transfer of expressed genes in a parasitic flowering plant
Source: PubMed Central journal article supplement (PMC3460754; doi:10.1186/1471-2164-13-227), 2012-06-08
Supplement: 1471-2164-13-227-S7.pdf [file 1471-2164-13-227-S7.pdf]

| ID     | bp  | No. of VGT | No. of mapped gDNA read | No. of intron | Prog | Top hit Species            | Top hit accession | E-value | Cov | Ident | Vitis rank | Vitis chromosome | Top annotated hit                                                       |
|--------|-----|------------|-------------------------|---------------|------|----------------------------|-------------------|---------|-----|-------|------------|------------------|-------------------------------------------------------------------------|
| 333189 | 177 | 0          | 0                       | -             | DMB  | <i>Vitis vinifera</i>      | XM_002279638.1    | 4e-36   | 99% | 80%   | 1          | chr9             | <i>Arabidopsis thaliana</i> putative bZIP protein                       |
| 333651 | 381 | 1          | 1                       | 1             | DMB  | <i>Vitis vinifera</i>      | FQ382796.1        | 2e-100  | 95% | 82%   | 1          | chr2             | <i>Ricinus communis</i> acetylornithine deacetylase, putative           |
| 333728 | 105 | 1          | 0                       | -             | DMB  | <i>Vitis vinifera</i>      | XM_002275068.1    | 3e-27   | 99% | 87%   | 1          | chr9             | <i>Ricinus communis</i> ubiquitin carboxyl-terminal hydrolase, putative |
| 333838 | 123 | 0          | 1                       | 0             | BN   | <i>Vitis vinifera</i>      | AK336366.1        | 1e-8    | 65% | 78%   | 1          | chr16            | Unknown                                                                 |
| 333872 | 780 | 0          | 0                       | -             | DMB  | <i>Populus trichocarpa</i> | XM_002321104.1    | 8e-85   | 96% | 69%   | 3          | chr12            | <i>Ricinus communis</i> ubiquitin fusion degradation protein, putative  |
| 333882 | 351 | 0          | 1                       | 1             | DMB  | <i>Populus trichocarpa</i> | XM_002325436.1    | 9e-61   | 75% | 80%   | 2          | chr4             | <i>Ricinus communis</i> riboflavin-specific deaminase, putative         |
| 334054 | 141 | 0          | 0                       | -             | DMB  | <i>Hordeum vulgare</i>     | AK362737.1        | 2e-24   | 92% | 80%   | 14         | chr4             | <i>Ricinus communis</i> UDP-sugar transporter, putative                 |
| 334144 | 558 | 0          | 5                       | 3             | DMB  | <i>Vitis vinifera</i>      | XM_002284850.1    | 3e-19   | 33% | 73%   | 1          | chr3             | Unknown                                                                 |
| 334652 | 267 | 0          | 0                       | -             | DMB  | <i>Vitis vinifera</i>      | XM_002283726.1    | 7e-48   | 94% | 77%   | 1          | chr6             | <i>Ricinus communis</i> glucosidase II beta                             |

|        |     |   |   |   |     |                            |                |       |      |     |      |               |                                                                                                                   |
|--------|-----|---|---|---|-----|----------------------------|----------------|-------|------|-----|------|---------------|-------------------------------------------------------------------------------------------------------------------|
| 334656 | 672 | 0 | 7 | 0 | MB  | <i>Vitis vinifera</i>      | FQ381335.1     | 0     | 97%  | 92% | 1    | chr6          | subunit, putative<br><i>Ricinus communis</i><br>catalytic, putative                                               |
| 334660 | 327 | 3 | 2 | 0 | MB  | <i>Vitis vinifera</i>      | XM_002282932.1 | 1e-29 | 73%  | 77% | 1    | chr18         | <i>Ricinus communis</i><br>kinesin heavy<br>chain, putative                                                       |
| 334741 | 417 | 0 | 1 | 0 | DMB | <i>Vitis vinifera</i>      | XM_002270744.1 | 3e-35 | 50%  | 83% | 1    | chr2          | Unknown                                                                                                           |
| 335786 | 177 | 0 | 3 | 0 | DMB | <i>Vitis vinifera</i>      | XM_002270742.1 | 1e-10 | 48%  | 81% | 1    | chr19         | Unknown                                                                                                           |
| 335857 | 126 | 0 | 2 | 0 | DMB | <i>Vitis vinifera</i>      | XM_002279944.1 | 1e-21 | 100% | 79% | 1    | chr14         | <i>Arabidopsis thaliana</i><br>HEAT<br>repeat-containing<br>protein<br>(SWEETIE)                                  |
| 336256 | 129 | 0 | 1 | 1 | DMB | <i>Vitis vinifera</i>      | XM_002266735.1 | 1e-15 | 77%  | 80% | 1    | chr14         | Unknown                                                                                                           |
| 336539 | 108 | 0 | 2 | 1 | DMB | <i>Vitis vinifera</i>      | XM_002284768.1 | 2e-4  | 66%  | 76% | 1    | chr18         | Unknown                                                                                                           |
| 336659 | 105 | 1 | 0 | - | BN  | No hits                    |                |       |      |     |      |               |                                                                                                                   |
| 336802 | 375 | 0 | 0 | - | MB  | <i>Rafflesia pricei</i>    | EU281020.1     | 0     | 100% | 99% | >120 | Mitochondrial | <i>Rafflesia pricei</i><br>cytochrome<br>oxidase subunit I<br>( <i>cox1</i> ) gene, partial<br>cds; mitochondrial |
| 336940 | 474 | 0 | 2 | 2 | DMB | <i>Populus trichocarpa</i> | XM_002320805.1 | 5e-91 | 99%  | 76% | 22   | Unknown       | <i>Arabidopsis thaliana</i><br>hexaprenyldihydr<br>oxybenzoate<br>methyltransferase<br>(COQ3)                     |
| 337488 | 162 | 0 | 1 | 0 | BN  | No hits                    |                |       |      |     |      |               |                                                                                                                   |
| 338097 | 147 | 1 | 0 | - | DMB | <i>Vitis vinifera</i>      | XM_002266364   | 7e-44 | 100% | 87% | 1    | chr13         | <i>Ricinus communis</i><br>beta-<br>galactosidase,<br>putative                                                    |
| 338243 | 156 | 0 | 1 | 1 | DMB | <i>Populus</i>             | XM_002319618.1 | 7e-19 | 82%  | 77% | 2    | chr14         | <i>Arabidopsis</i>                                                                                                |

| <i>trichocarpa</i> |     |   |    |   |     |                            |                |        |     |     |     |               | <i>thaliana</i>                                                                                        |
|--------------------|-----|---|----|---|-----|----------------------------|----------------|--------|-----|-----|-----|---------------|--------------------------------------------------------------------------------------------------------|
|                    |     |   |    |   |     |                            |                |        |     |     |     |               | transcription factor jumonji and C5HC2 type zinc finger domain-containing protein                      |
| 339075             | 639 | 0 | 0  | - | MB  | <i>Vitis vinifera</i>      | XM_002271943.1 | 0      | 98% | 87% | 1   | chr1          | <i>Ricinus communis</i> ankyrin repeat-containing protein, putative                                    |
| 340728             | 534 | 1 | 4  | 0 | DMB | <i>Vitis vinifera</i>      | FQ381717.1     | 1e-11  | 88% | 64% | 1   | chr13         | <i>Populus trichocarpa</i> f-box family protein (FBL9)                                                 |
| 341676             | 282 | 0 | 74 | 0 | MB  | <i>Vitis vinifera</i>      | GQ220326.1     | 2e-110 | 99% | 93% | 1   | Mitochondrial | <i>Platanus occidentalis</i> mitochondrial ribosomal protein S7 ( <i>rps7</i> )                        |
| 342353             | 201 | 1 | 2  | 0 | BN  | <i>Triticum aestivum</i>   | AK334693.1     | 6e-15  | 58% | 76% | 2   | chr18         | <i>Oryza sativa</i> PHD finger family protein                                                          |
| 342556             | 765 | 0 | 6  | 2 | MB  | <i>Vitis vinifera</i>      | XM_002274635.1 | 0      | 99% | 86% | 1   | chr15         | <i>Ricinus communis</i> oxidoreductase, putative                                                       |
| 343080             | 171 | 0 | 0  | - | DMB | <i>Glycine max</i>         | BT091661.1     | 9e-31  | 89% | 80% | 3   | chr1          | Unknown                                                                                                |
| 343101             | 174 | 1 | 2  | 0 | BN  | <i>Glycine max</i>         | AK286903.1     | 9e-06  | 68% | 92% | (2) |               | Unknown                                                                                                |
| 345350             | 147 | 1 | 0  | - | DMB | <i>Populus trichocarpa</i> | XM_002330916.1 | 7e-25  | 95% | 79% | 2   | chr14         | <i>Arabidopsis thaliana</i> regulator of chromosome condensation domain-containing protein (AT3G02300) |

|        |     |   |   |   |     |                       |                |        |     |     |     |       |                                                                                              |
|--------|-----|---|---|---|-----|-----------------------|----------------|--------|-----|-----|-----|-------|----------------------------------------------------------------------------------------------|
| 345865 | 852 | 0 | 4 | 0 | DMB | <i>Vitis vinifera</i> | FQ385727.1     | 2e-124 | 90% | 79% | 1   | chr7  | <i>Arabidopsis thaliana</i><br>prenylcysteine oxidase (FCLY)                                 |
| 347162 | 657 | 0 | 0 | - | MB  | <i>Vitis vinifera</i> | XM_002269195.1 | 0      | 97% | 87% | 1   | chr19 | <i>Ricinus communis</i><br>cytochrome C oxidase assembly protein <i>cox15</i> , putative     |
| 347814 | 213 | 0 | 0 | - | DMB | <i>Vitis vinifera</i> | FQ387635.1     | 9e-39  | 94% | 78% | 1   | chr11 | <i>Arabidopsis thaliana</i> NADH dehydrogenase (ubiquinone) 1 alpha subcomplex 1 (AT3G08610) |
| 348124 | 543 | 0 | 5 | 1 | BN  | <i>Oryza sativa</i>   | NM_001062124.1 | 1e-4   | 22% | 71% | (3) |       | Unknown                                                                                      |
| 348250 | 168 | 0 | 0 | - | BN  | No hits               |                |        |     |     |     |       |                                                                                              |
| 348974 | 573 | 0 | 4 | 1 | MB  | <i>Vitis vinifera</i> | XM_002270094.1 | 3e-176 | 97% | 87% | 1   | chr15 | <i>Ricinus communis</i><br>glutamyl-tRNA(Gln) amidotransferase subunit A, putative           |
| 349164 | 354 | 0 | 9 | 0 | MB  | <i>Vitis vinifera</i> | FQ382494.1     | 1e-138 | 97% | 92% | 1   | chr19 | <i>Gossypium hirsutum</i><br>rhamnose synthase (RHM2)                                        |
| 349228 | 558 | 0 | 0 | - | DMB | <i>Vitis vinifera</i> | FQ381933.1     | 2e-84  | 94% | 73% | 1   | chr2  | <i>Ricinus communis</i><br>ATP binding protein, putative                                     |
| 349578 | 561 | 0 | 4 | 2 | MB  | <i>Vitis vinifera</i> | XM_002283781.1 | 0      | 95% | 88% | 1   | chr17 | <i>Ricinus communis</i><br>deoxycytidylate deaminase,                                        |

|        |     |   |   |   |     |                            |                |        |      |     |   |         |                                                                                            |
|--------|-----|---|---|---|-----|----------------------------|----------------|--------|------|-----|---|---------|--------------------------------------------------------------------------------------------|
| 349697 | 486 | 0 | 2 | 0 | DMB | <i>Vitis vinifera</i>      | XR_077894.1    | 6e-39  | 52%  | 74% | 1 | chr9    | putative<br><i>Arabidopsis thaliana</i><br>polygalacturonase<br>QRT3 (QRT3)                |
| 349718 | 732 | 0 | 0 | - | DMB | <i>Populus trichocarpa</i> | XM_002305552.1 | 6e-168 | 99%  | 78% | 3 | chr10   | <i>Ricinus communis</i><br>derlin-2, putative                                              |
| 349768 | 321 | 1 | 1 | 1 | DMB | <i>Vitis vinifera</i>      | FQ382715.1     | 3e-54  | 70%  | 81% | 1 | chr7    | <i>Ricinus communis</i><br>casein kinase II,<br>putative                                   |
| 350313 | 414 | 0 | 4 | 2 | DMB | <i>Vitis vinifera</i>      | FQ393633.1     | 2e-115 | 100% | 82% | 1 | chr18   | <i>Ricinus communis</i><br>glycerophosphoryl<br>diester<br>phosphodiesterase<br>, putative |
| 351354 | 327 | 0 | 3 | 1 | DMB | <i>Vitis vinifera</i>      | XM_002283439.1 | 2e-56  | 99%  | 75% | 1 | chr5    | <i>Ricinus communis</i><br>aspartyl<br>aminopeptidase,<br>putative                         |
| 352143 | 243 | 0 | 2 | 1 | DMB | <i>Vitis vinifera</i>      | XM_002271948.1 | 2e-36  | 69%  | 80% | 1 | chr11   | <i>Arabidopsis thaliana</i><br>diacylglycerol<br>kinase 3 (DGK3)                           |
| 352578 | 327 | 0 | 0 | - | DMB | <i>Vitis vinifera</i>      | XM_002282519.1 | 7e-62  | 99%  | 76% | 1 | chr8    | Unknown                                                                                    |
| 352590 | 117 | 0 | 1 | 1 | DMB | <i>Vitis vinifera</i>      | XM_002266054.1 | 2e-23  | 100% | 82% | 1 | Unknown | <i>Ricinus communis</i><br>XPA-binding<br>protein, putative                                |
| 352635 | 690 | 1 | 3 | 0 | DMB | <i>Vitis vinifera</i>      | XM_002263874.1 | 3e-70  | 47%  | 78% | 1 | chr5    | <i>Arabidopsis thaliana</i><br>ankyrin<br>repeat-containing<br>protein<br>(AT3G24210)      |

Notes: **ID** = *Rafflesia* sequence ID from this study; **bp** = number of base pairs in the transcript; **No. of VGT** = number of vertically inherited *Rafflesia* transcripts in the same gene cluster; **No. of mapped gDNA reads** = number of *Rafflesia* genomic DNA (gDNA) Illumina read (150bp) mapped onto cDNA transcript; **No. of intron** = number of intron based on the mapped gDNA read; **Prog** = BLAST algorithm used: **MB** = high similarity Megablast, **DMB** = Somewhat dissimilar discontinuous megablast, and **BN** = Somewhat similar blastn; **Top hit species** = species with highest confidence BLAST hit; No hits indicates that no sequence was identified in any of the three BLAST searches with an e-value <0.0001. **Top hit Accession** = Genbank accession number of top hit; **E-value** = E-value from BLAST of top hit; **Cov** = percent coverage; **Ident** = percent identity with top hit; **Vitis rank** = position of *Vitis* sequence among BLAST hits in Genbank, numbers in parentheses indicate number of sequences on list if *Vitis* was not present; **Vitis chromosome** = chromosomal location of *Vitis* sequence; **Top annotated hit** = top hit with some indication or inference of gene function.
