# Supplementary material for: Horizontal transfer of expressed genes in a parasitic flowering plant
Source: PubMed Central journal article supplement (PMC3460754; doi:10.1186/1471-2164-13-227), 2012-06-08
Supplement: 1471-2164-13-227-S10.pdf [file 1471-2164-13-227-S10.pdf]

Consensus

Aquilegia@AcoGoldSmith\_v1.003556m|PACid:18155809
Aquilegia@scaffold10\*
Arabidopsis@AT2G15860.2|PACid:19642802
Arabidopsis@chromosome2\*
Manihot@cassava4.1\_005414m|PACid:17984656
Manihot@scaffold08799\*
Oryza@LOC\_Os03g52780.1|PACid:16849886
Oryza@chromosome3\*
Populus@POPTR\_0009s11110.1|PACid:18227980
Populus@scaffold9\*
Rafflesia@334144\_cDNA
Rafflesia@genomic\_DNA\*
Ricinus@29851.m002506|PACid:16811532
Ricinus@29851\*
Vitis@GSVIVT01031842001|PACid:17837936
Vitis@chromosome3\*

1121 1130 1140 1150 1160 1170 1180 1190 1200
GGTTCACAAG TGCTTTGGCA GGACTARCTG CAAATGATAT AGTTCAAAGG ACTGCTGGCA GRCTAGAATC TCTTCACTCA
.A.....C CATCC..A.T ..G...G... GG.C...A.. C..C...AA .....G..T.... CA.....G
.A.....C CATCC..A.T ..G...G... GG.C...A.. C..C...AA .....G..T.... CA.....G
.....A .....A.G .....CAC. T..... GA.C..GC.A ..C.G..... .G..T....
.....A .....A.G .....CAC. T..... GA.C..GC.A ..C.G..... .G..T....
.....T.....C.A...G..TAA.....C... ..G...A .....G..AT...G.....
.....T.....C.A...G..TAA.....C... ..G...A .....G..AT...G.....
.....C.C..C..C...GC..G..CT..C .....G..T..CA..C... ..CA..AAT.. .G...GA..A.....G
.....C.C..C..C...GC..G..CT..C .....G..T..CA..C... ..CA..AAT.. .G...GA..A.....G
.....A .....A...A.G...TG...C... ..A.....A...A...A...A...T...A...
.....A .....A...A.G...TG...C... ..A.....A...A...A...A...T...A...
.....C.GT.GG. CA.A...T..A..GGGC..G...GC.CC..G.....TGACT..G...G...T...
.....C.GT.GG. CA.A...T..A..GGGC..G...GC.CC..G.....TGACT..G...G...T...
.....T.....A.T.....A... T..... ..CA... ..A.....A...G...T
.....T.....A.T.....A... T..... ..CA... ..A.....A...G...T
.....G...C.....CA... ..A.....A...T...
.....G...C.....CA... ..A.....A...T...

Consensus

Aquilegia@AcoGoldSmith\_v1.003556m|PACid:18155809
Aquilegia@scaffold10\*
Arabidopsis@AT2G15860.2|PACid:19642802
Arabidopsis@chromosome2\*
Manihot@cassava4.1\_005414m|PACid:17984656
Manihot@scaffold08799\*
Oryza@LOC\_Os03g52780.1|PACid:16849886
Oryza@chromosome3\*
Populus@POPTR\_0009s11110.1|PACid:18227980
Populus@scaffold9\*
Rafflesia@334144\_cDNA
Rafflesia@genomic\_DNA\*
Ricinus@29851.m002506|PACid:16811532
Ricinus@29851\*
Vitis@GSVIVT01031842001|PACid:17837936
Vitis@chromosome3\*

1210 1220 1230 1240 1250 1260 1270 1280
GAGGGGGTTC AT-----
.A.A.A.C. ....GTATGGGA AGATATTTTG AAAGTAGTGT TGATTTTCTA TTTTATTA TA GAAGTTCAT-
.A.A.A.C. ....GTATGGGA AGATATTTTG AAAGTAGTGT TGATTTTCTA TTTTATTA TA GAAGTTCAT-
.....A .....A.G .....CAC. T..... GA.C..GC.A ..C.G..... .G..T....
.....A .....A.G .....CAC. T..... GA.C..GC.A ..C.G..... .G..T....
.....GTATGGAA ATATGTTGGA TTTCATGGGA ACATTTATTT TATTGTTTTT TCTTAATCTT GATTGCTTTT
.....GTATGGAA ATATGTTGGA TTTCATGGGA ACATTTATTT TATTGTTTTT TCTTAATCTT GATTGCTTTT
.....T.....C.....CGTACGTC ATATTGTATA ATGTTTCAGTT GTTTATCCTT GCTCTTTGAA CTA
.....T.....C.....CGTACGTC ATATTGTATA ATGTTTCAGTT GTTTATCCTT GCTCTTTGAA CTA
.....C.....GTATGGAA ATATCTTTTA TTTATTTTGT TTTCTATGTT CACATTTTGT TFACTGTTTG AAGAAGG--
.....C.....GTATGGAA ATATCTTTTA TTTATTTTGT TTTCTATGTT CACATTTTGT TFACTGTTTG AAGAAGG--
.A.AA...C.....CGTATGGCC CCAAATGGGG GATGCTTGTG GTATTTGCTT GCATGGGGA-
.A.AA...C.....CGTATGGCC CCAAATGGGG GATGCTTGTG GTATTTGCTT GCATGGGGA-
.....C.....GTATGGAA A-----A TGTCCTCGTAC AGTTTTCTTT GTTTAGCTTT CTTTACCTCA CAAAGCTGTC
.....C.....GTATGGAA A-----A TGTCCTCGTAC AGTTTTCTTT GTTTAGCTTT CTTTACCTCA CAAAGCTGTC
.....GTATGGAA ATATCTCAGA TGTTTATCAA GAACTTTTTA GTCACATTAT TTTTCCATTA ACATTGGGTT
.....GTATGGAA ATATCTCAGA TGTTTATCAA GAACTTTTTA GTCACATTAT TTTTCCATTA ACATTGGGTT

Consensus

Aquilegia@AcoGoldSmith\_v1.003556m|PACid:18155809
Aquilegia@scaffold10\*
Arabidopsis@AT2G15860.2|PACid:19642802
Arabidopsis@chromosome2\*
Manihot@cassava4.1\_005414m|PACid:17984656
Manihot@scaffold08799\*
Oryza@LOC\_Os03g52780.1|PACid:16849886
Oryza@chromosome3\*
Populus@POPTR\_0009s11110.1|PACid:18227980
Populus@scaffold9\*
Rafflesia@334144\_cDNA
Rafflesia@genomic\_DNA\*
Ricinus@29851.m002506|PACid:16811532
Ricinus@29851\*
Vitis@GSVIVT01031842001|PACid:17837936
Vitis@chromosome3\*

1290 1300 1310 1320 1330 1340 1350 1360
-----T CTCATTGAC AACTTCAAA TTTTCATACA G.A.....C.A....
-----T CTCATTGAC AACTTCAAA TTTTCATACA G.A.....C.A....
GTTTCCTTTT ATTGGCTGAA AAACGACCTA TTAACATGAA AAATGAAATC TCCTTCTGCA G.A.A.T...G.....
GTTTCCTTTT ATTGGCTGAA AAACGACCTA TTAACATGAA AAATGAAATC TCCTTCTGCA G.A.A.T...G.....
ACTTCCCTGA GTTGGG-----T AAAATCATGA TAAAAATGCA TATTTGTGCA G..G..T..T.....TA
ACTTCCCTGA GTTGGG-----T AAAATCATGA TAAAAATGCA TATTTGTGCA G..G..T..T.....TA
-----T ACATTTTGTCT TA TAAAAATGCA TCCCTGTGCA G..AT.G...T...T.
-----T ACATTTTGTCT TA TAAAAATGCA TCCCTGTGCA G..AT.G...T...T.
-----C AAAATATGAT AAATATGCA TGCTATGCA G.A.....T.....
-----C AAAATATGAT AAATATGCA TGCTATGCA G.A.....T.....
-----A ATTACTTCGA ATCTAACATG TTGTGATGCA G..G.A...G.....G
-----A ATTACTTCGA ATCTAACATG TTGTGATGCA G..G.A...G.....G
TAGGT-----A TGA TAAGAAA TGA AATGCT TGCTCTGCA G..G...T.....A
TAGGT-----A TGA TAAGAAA TGA AATGCT TGCTCTGCA G..G...T.....A
TA-----T AGTTACATAT CTAATATGCA TTTTGTATACA G..G...G.....
TA-----T AGTTACATAT CTAATATGCA TTTTGTATACA G..G...G.....

Consensus

Aquilegia@AcoGoldSmith\_v1.003556m|PACid:18155809
Aquilegia@scaffold10\*
Arabidopsis@AT2G15860.2|PACid:19642802
Arabidopsis@chromosome2\*
Manihot@cassava4.1\_005414m|PACid:17984656
Manihot@scaffold08799\*
Oryza@LOC\_Os03g52780.1|PACid:16849886
Oryza@chromosome3\*
Populus@POPTR\_0009s11110.1|PACid:18227980
Populus@scaffold9\*
Rafflesia@334144\_cDNA
Rafflesia@genomic\_DNA\*
Ricinus@29851.m002506|PACid:16811532
Ricinus@29851\*
Vitis@GSVIVT01031842001|PACid:17837936
Vitis@chromosome3\*

1370 1380 1390 1400 1410 1420 1431
GYTTGCGAGT GTCTCAACTT CTGATGCTTG GAAAATCCRT CATATCYAAT GCTAACAAAG TTCAGGATGA A
.C.....G... ..C...T.G ..TC..... ..AA... ..C..T.G... ..A.C..... CA...A....
.C.....G... ..C...T.G ..TC..... ..AA... ..C..T.G... ..A.C..... CA...A....
.T.....G... CA..A.T..G ..T..C..C.. ..T..G...A. G.....TC... ..C.....
.T.....G... CA..A.T..G ..T..C..C.. ..T..G...A. G.....TC... ..C.....
.C.C.A.....C.....C.....C.....C.....A.....C.T.....A.....G.....A.....
.C.C.A.....C.....C.....C.....C.....A.....C.T.....A.....G.....A.....
.C.C.....C.....C.....C.....C.....TG..T..T..GGC..T..TCT..C CAA..A.....
.C.C.....C.....C.....C.....C.....TG..T..T..GGC..T..TCT..C CAA..A.....
.T.CG..... ..T.....TG..... ..T.....TG..... ..C..... ..C.A...
.T.CG..... ..T.....TG..... ..T.....TG..... ..C..... ..C.A...
CCG.C.CA.T...A...G ..AGCAT... CC..G...G..G.T.TA.GC CGAGG.GG..CCAT.....
CCG.C.CA.T...A...G ..AGCAT... CC..G...G..G.T.TA.GC CGAGG.GG..CCAT.....
.T.CA..T... ..T.....TG..... ..T.....TG..... ..C..... ..C.A...
.T.CA..T... ..T.....TG..... ..T.....TG..... ..C..... ..C.A...
.T.....G... ..T.....TG..... ..T.....TG..... ..C..... ..C.A...
.T.....G... ..T.....TG..... ..T.....TG..... ..C..... ..C.A...
