# Supplementary material for: Horizontal transfer of expressed genes in a parasitic flowering plant
Source: PubMed Central journal article supplement (PMC3460754; doi:10.1186/1471-2164-13-227), 2012-06-08

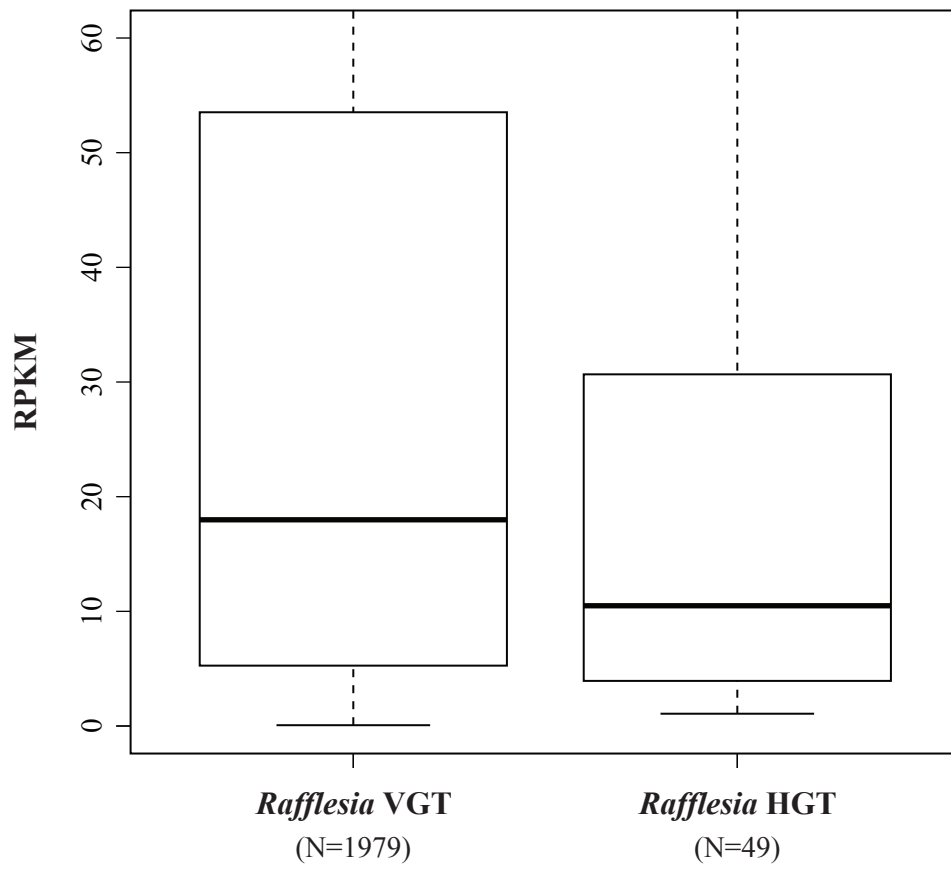

Supplement: 1471-2164-13-227-S11.pdf [file 1471-2164-13-227-S11.pdf]
